# Supplementary material
Source: Springer Nature journal article supplement (https://www.springermedizin.de/resource/supplementary/12916_2011_413_MOESM4_ESM.pdf/9599902)

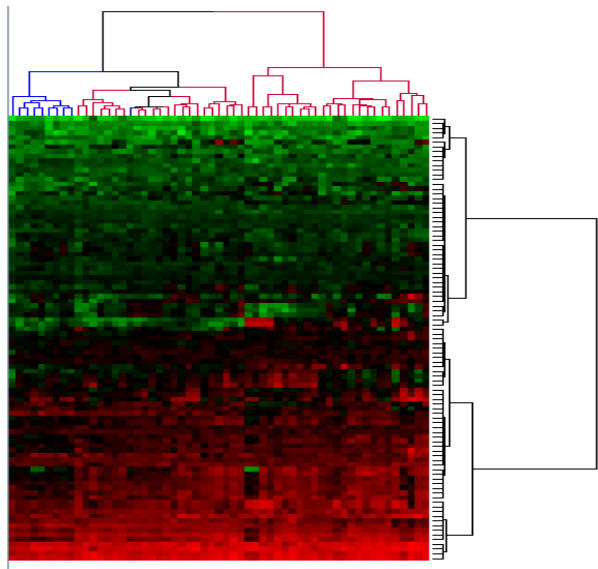

A

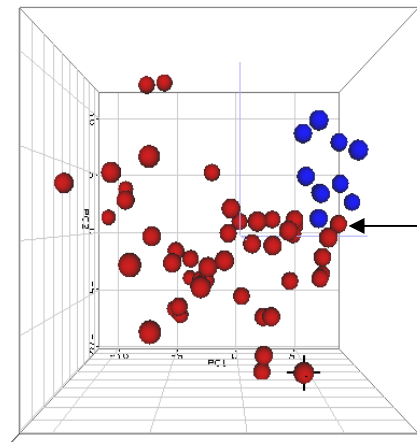

B

SLEDAI Score 2

Supplement: MOESM4 [file 9599902]
